# Supplementary material for: Coronary Intervention for Persistent Occlusion after Myocardial Infarction
Source: Atypon-hosted journal article supplement (doi:10.1056/nejmoa066139), 2006-11-14
Supplement: nejm_hochman_2395sa1.pdf [file nejm_hochman_2395sa1.pdf]

## Supplementary Appendix

This appendix has been provided by the authors to give readers additional information about their work.

Supplement to: Hochman JS, Lamas GA, Buller CE, et al. Coronary intervention for persistent occlusion after myocardial infarction. *N Engl J Med* 2006;355:2395-407.

## Supplementary figure: Flow of trial participants

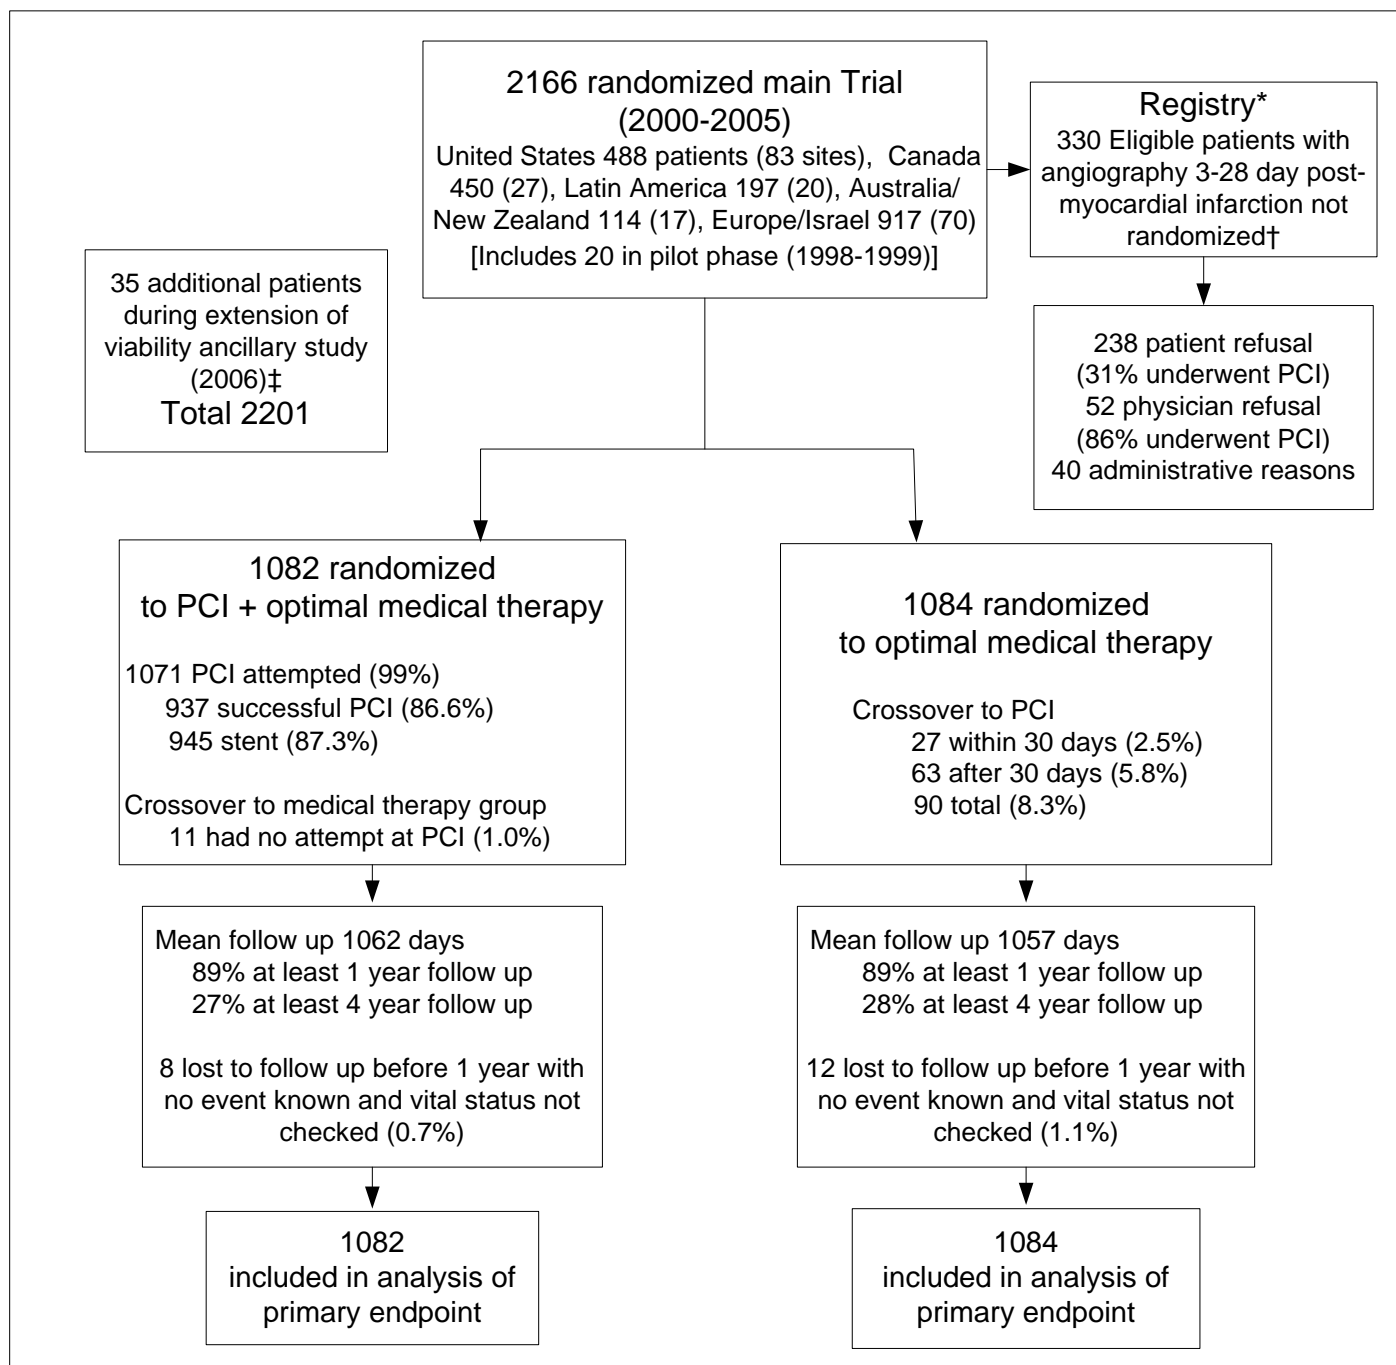

\*A limited registry of fully eligible patients was maintained for comparison with the enrolled population. Patients who presented late after myocardial infarction and underwent angiography earlier than day 3 were not included and therefore registry numbers represent an underestimate of the prevalence of total occlusion of the infarct-related artery. Registry patients had similar characteristics to randomized patients (mean age 58 years, 23% women, infarct-related artery distribution: left anterior descending 32%, circumflex 17%, right coronary 51%). †4623 patients with acute myocardial infarction not eligible for the Occluded Artery Trial were recorded in screening logs during 2 one-month periods. Among those patients with ST elevation myocardial infarction logged, 63% underwent primary PCI.

‡As of December 31, 2005, the planned end to trial recruitment, the viability ancillary study had not achieved its target study size. Therefore, additional patients (35) were enrolled in 2006 and adhered to the ancillary study and main Occluded Artery Trial protocols. Because the follow up period would be insufficient, it was pre-specified by the data safety monitoring board and study leadership that these 35 patients would not be included in the Occluded Artery Trial primary report. Sensitivity analysis demonstrated no difference in the results when these 35 patients were included.

**Supplementary table: Cardiovascular Status at Each Follow-up Contact**

|                        | PCI             | MED             | P-value |
|------------------------|-----------------|-----------------|---------|
|                        | <i>Num (%)</i>  | <i>Num (%)</i>  |         |
| <b>Angina Pectoris</b> |                 |                 |         |
| 4-Month                | 190/1015 (18.7) | 256/1026 (25.0) | <0.001  |
| 12-Month               | 158/964 (16.4)  | 211/958 (22.0)  | 0.002   |
| 24-Month               | 101/735 (13.7)  | 128/728 (17.6)  | 0.04    |
| 36-Month               | 45/495 (9.1)    | 49/477 (10.3)   | 0.53    |
| 48-Month               | 29/263 (11.0)   | 24/257 (9.3)    | 0.52    |
| 60-Month               | 8/94 (8.5)      | 7/93 (7.5)      | 0.80    |
| <b>Heart Failure</b>   |                 |                 |         |
| 4-Month                | 100/1015 (9.9)  | 121/1026 (11.8) | 0.16    |
| 12-Month               | 72/964 (7.5)    | 89/958 (9.3)    | 0.15    |
| 24-Month               | 52/735 (7.1)    | 57/728 (7.8)    | 0.58    |
| 36-Month               | 28/495 (5.7)    | 29/477 (6.1)    | 0.78    |
| 48-Month               | 11/263 (4.2)    | 13/257 (5.1)    | 0.63    |
| 60-Month               | 2/93 (2.1)      | 5/93 (5.4)      | 0.24    |

The reports of angina and heart failure are for the four-month period prior to the interview.

Any Canadian Cardiovascular Class of angina is included.

Any New York Heart Association Class of heart failure is included.

**In addition to the authors the following Investigators participated in the Occluded Artery Trial (numbers of patients enrolled of the 2201 total):**

**United States (489):** Cardiovascular Associates/Wellmont Holston Valley Center- E. Balcells, T. Dicken, A. Armstrong (38); University of Virginia Health System- M. Ragosta, L. Bailes (37); York Hospital- CE. Martin, B. Delio-Cox, K.Hutcheson (34); St. Luke's-Roosevelt Hospital Center- J. Tamis-Holland, D. Tormey (20); Asheville Cardiology Associates- W. Saunders, D. Oskins, C. Patton (18); Albert Einstein College of Medicine- V. Srinivas, S. Monrad, E. Vartolomei (18); Duke University Medical Center- J. Tcheng, M. Sketch, Jr, S. Dickerson (17); Kaiser Permanente- Los Angeles Medical Center- V. Aharonian, P. Mansukhani (12); Pinnacle Health, Harrisburg Hospital and Holy Spirit Hospital- A.Wali, R. Yost, S. Kilbride (11); University Hospitals of Cleveland and Southwest General Health Center- D. Adler, R. Nair, S. Mazzurco, G. Mlinaric (10); Montefiore Medical Center-Moses Campus- M. Menegus, M. Greenberg, F. Paulison (10); Cardiology Associates of North Mississippi- B. Bertolet, M. Jones (10); HeartCare Midwest- A. Chu, S. Kurtz, M. Pierson (9); Truman Medical Center, University of Missouri- Kansas City- M. Garg, J. Mckelvy (9); VA Medical Center Oklahoma City and University of Oklahoma Health Sciences Center- E. Schechter, K. Husain, J. Crawford (8(3)); Evanston Northwestern Healthcare- M. Salinger, D. Seifert (8); UT Southwestern Medical Center at Dallas- J. Cigarroa, T. Addo, K. Pinkston, V. Zertuche (8); Central Arkansas Veteran's Healthcare System (CAVHS) and University of Arkansas for Medical Sciences (UAMS)- L. Garza, J. Saucedo, P. Barton (8); NY Presbyterian Hospital – Cornell- S. Wong, D. Reynolds (8); Southern Arizona VAMC- H. Thai , A. Morgan (7); Maine Medical Center- T. Ryan, Jr., S. Bosworth-Farrell (7); PinnacleHealth- W. Bachinsky, A. Todd, C. Schaeffer (7); Winthrop University Hospital- K. Marzo, R. Daggubati, B. George (6); University of Louisville- M. Leesar, L. Schaffer (6); The Ohio State University Medical Center- R. Mgorien, C. Bush (6); Cardiology of Oklahoma- Tulsa Regional Medical Center- M. Carney, A. Hailman (6); Grant Medical Center- P. Amsterdam, T. Perry (6); NYU Medical Center- F. Feit, E. Weisman (6); Downriver Cardiology-Oakwood Southshore Medical Center- F. Rogers, J. Amos (5); Pima Research Foundation- L. Lancaster, K. Johnston (5); Catholic Medical Center- W. Bradley, L. Pimenta (5); The Toledo Hospital and Flower Hospital- A. Nahhas, S. Vivian, A. Patznick (5); Northwest Ohio Cardiology Consultants/The Toledo Hospital- J. Letcher, D. Philip (5); University of North Carolina at Chapel Hill- EM. Ohman, V. Menon, L. Davis (5); Geisinger Medical Center- J. Blankenship, D. Zimmerman (4); St. Paul Heart Clinic- KW. Baran, T. Walsh (4); Watson Clinic Center for Research, Inc.- K. Browne, Jr., K. Prisoc (4); Cooper Health System- J. Aji, C. Rickette (4); Morristown Memorial Hospital- M. Blum, R. Lao, D. Cox (4); Rochester General Hospital- TP. Stuver, P. Noll (4); Mount Sinai Medical Center- P. Vignola, A. Rosado (3); Advanced Cardiovascular Specialists, LLP- SR. Sherron, D. White (3); The Heart and Vascular Institute of Florida- PA. Cambier, CH. McGee (3); Michigan Heart PC- J. Bengtson, C. Carulli (3); East Tennessee Heart Consultants- CB. Treasure, II, CS. Bales (3); Bronx-Lebanon Hospital Center- EJ. Brown, Jr., V. Amada, L. Rodriguez (3); University of Maryland- B. Reicher, SE. Sarang, M. McLane (3); Boston University Medical Center- AK. Jacobs, D. Fine (3); Jersey Shore University Medical Center- M. Bach, K. Bott (3); Westmoreland Regional Hospital- JJ. Chahin, N. Bruno (3); Penn State/Hershey Medical Center- IC. Gilchrist, HE. Zimmerman (2); Genesis Medical Center- V. Rajendran, C. Sloane (2); The University of Texas Medical Branch- B. Uretsky, NK. Wadhwa-Loran (2); Henry Ford Hospital- A. Greenbaum, J. Longlade (2); Scripps Mercy Hospital- PS. Phillips, N.Gray (2); Oklahoma Foundation for Cardiovascular Research- R. Kipperman, T. Ramsey, S. Hanes (2); St. Elizabeth

Hospital- A. Labib, C. Engartner (2); LDS Hospital- JB. Muhlestein, J. Lappé, J. Hunter (2); University of Pittsburgh Medical Center- C. Smith, DJ. Rosenfelder (2); Advanced Cardiac Specialists, Division of Research- RM. Siegel, A. Bhaskaran, J. Vermillion (2); Tufts-New England Medical Center- C. Kimmelstiel, P. Field (2); Tallahassee Research Institute, Inc.-J. Katopodis, P. Knap (2); Conemaugh Memorial Medical Center- RG. Stenberg, K. Allsbouse (2); University of Michigan Health Systems- ER. Bates, A. Luciano (2); Columbia University Medical Center- LE. Rabbani, S. Mazer, E. Escala (2); Minneapolis VA Medical Center- E. McFalls, D. Johnson (2); New York VA Medical Center- SP. Sedlis, M. Keary (2); Akron Cardiology Consultants, Inc./Summa Health System- KH. Silver, S. Witsaman (2); Allegheny General Hospital- T.Farah, C. Harter (2); Northeast Cardiology Associates- R.Fincke, C. Whited (2); New York Hospital of Queens- SP. Papadakos, MV. Brown (1); UMDNJ-R.W. Johnson Medical School- AE. Moreyra, S. Palmieri, M. Cargill, L. Cassazza (1); Beth Israel Medical Center- DL. Brown, P. McGowan (1); Deborah Heart and Lung Center- MA. Taylor, K. DeRosa (1); Ralph H. Johnson VAMC- C. Nielsen, L. Harrell (1); Brookdale University Hospital & Medical Center- HL. Chadow, R. Hauptman (1); Louisville Cardiology Medical Group- R. Licandro, R. Dickerson (1); Christus St. Elizabeth Hospital- TK. Colgan, BL. Sitton (1); Cardiology Associates of Corpus Christi- J.Douglas Pappas, R. Rocha (1); Greenville Memorial Hospital- B. McLaurin, S. Harrelson (1); Western Cardiology Associates- NK. Vijay, M. Washam (1); Alta Bates Summit Medical Center- RM. Greene, E. Healy (1); **Canada (454): Country Leader: V. Dzavik;** Country Coordinator: D. Atchison; University of British Columbia-Vancouver General Hospital- CE. Buller, RS. Fox, S. MacLeod (79); Toronto General Hospital-UHN and Mount Sinai Hospital- J. Ross, A. Barolet, V. Dzavik, AR. Patel (60); University of British Columbia-St. Paul's Hospital Interventional Cardiology Research- R. Carere, J. Webb, T. Kot, L. Milosavljevic (44); St. Michael's Hospital, University of Toronto- WJ. Cantor, A. Fry (43); Sunnybrook & Women's College Health Sciences Centre- EA. Cohen, L. Balleza (42); London Health Sciences Centre- D. Almond, D. Wiseman (23); University of Alberta Hospital- JR. Burton, L. Lindholm, N. Hogg (19); Hotel Dieu Grace Hospital- A. Glanz, R. Chetty, C. Vilag (18); Montreal Heart Institute- L. Bilodeau, N. Hardy, N. St-Jean (15); Royal Alexandra Hospital- N. Brass, C. Buck (14); London Health Sciences Centre-University Campus- WJ. Kostuk, S. Carr (11); University of Ottawa Heart Institute- M. Labinaz, N. Shore (10); QE II Health Sciences Centre- LM. Title, N. Fitzgerald (10); Health Science Center, St. John's Newfoundland- B. Rose, A. Rideout (9); Health Sciences Centre- J. Ducas, S. Loeza Aceves, A. Munoz (8); Peterborough Regional Health Centre; A. Janmohamed, A. Abdulla, B. Potvin (7); Foothills Medical Centre- NG. Filipchuk, T. Anderson, L. Fisk (6); St. Boniface General Hospital- A.Miller, M. Wilson (6); Trillium Health Centre- C.Lazzam, A. Carter (6); Saint John Regional Hospital- S. Lutchmedial; E. Collings, J. Drake (6); The Scarborough Hospital-General Division- J. Cherry, J. Smith, (5); Victoria Heart Institute Foundation- JD. Hilton, L. Pelzer, (4); Sturgeon Community Hospital- J. Allen, D. Hoskins (2); Hamilton Health Sciences, McMaster University- MK. Natarajan, G. Cappelli (2); Hôpital du Sacré-Coeur de Montréal- É. Schampaert, C. Mercure (2); Maisonneuve-Rosemont Hospital- C. Constance, MF. Gauthier (2); CHUM Norte-Dame- F. Reeves, M. Pashko (1); **Poland (282): Country Leaders: W. Ruzyllo, Z. Sadowski;** National Institute of Cardiology- W. Ruzyllo, M. Kruk (58); Upper Silesian Cardiac Center-Silesian Medical School- P. Buszman, A. Zurakowski (33); SP Wojewodzki Szpital Zespolony w Szczecinie- M. Kurowski, B. Busz-Papiez (28); Dept. of Cardiology T. Marciniak Hospital- K. Loboż-Grudzien, L. Sokalski (27); Clinical Military Hospital- W. Banasiak, P. Ponikowski, M.Dzidowski (18); John Paul II Hospital- K. Zmudka, P.

Czunko (18); Department of Cardiology, Medical University of Warsaw- G. Opolski, J. Kochman, M. Roik, A. Oreziak (18); Klinika Intensywnej Terapii Kardiologicznej- M. Dziarmaga, B. Bychowiec, G. Bartkowiak (16); Oddział Kardiologii Wojewodzkie Centrum Medyczne- W. Pluta, A. Wester, J. Sacha (14); Oddz. Kardiologii, Szp. Wojew- E. Zinka, W. Jablonski (14); Wojewódzki Szpital Zespolony, Oddział Kardiologii i Intensywnej Opieki Kardiologicznej- K. Jaworska, A. Raczyńska, G. Skonieczny (11); The Pope John Paul II Hospital- A. Kleinrok, P. Dabrowski (9); Świętokrzyskie Centrum Kardiologii- M. Janion, J. Sielski (6); I Klinika Kardiologii- M. Trusz-Gluza, K. Wita, A. Drzewiecka-Gerber (5); Medical University of Gdansk, II Department of Cardiology- A. Dabrowska-Kugacka, W. Dorniak (4); Department of Cardiology CSK WAM- J. Adamus, M. Zarebinski (2); Klinika Kardiologii Inwazyjnej CSK MSW I A- R. Gil, R. Krzyzewski (1); **Brazil (148): Country Leader: AC. Carvalho**; Hospital São Paulo- AC. Carvalho, R. Azevedo, V. Laet (36); Hospital São Lucas- P. Caramori, R. Lasevitch, P. Hickmann (29); Hospital Clinicas-USP-Ribeirao Preto- JA. Marin-Neto, GL. Figueiredo, MO. Lima-Filho (24); Santa Casa de Belo Horizonte- G. Reis, A. Lima Filho (19); Hospital Socor- J. Saad, M. Machado (13); Instituto de Cardiologia do Rio Grande do Sul- C. Gottschall, R. Sarmento-Leite (13); Instituto do Coração and Santa Casa de Misericórdia de Juiz de Fora-MG- AJ. Muniz, J. Lopes, R. Castro, G. Ramalho (6); Hospital Bandeirantes- H. Castello, M. Cantarelli (6); Hospital de Clínicas de Porto Alegre- P. Caramori, P. Hickmann (2); **Slovakia (136): Country Leader: V. Fridrich**; Slovak Institute of Cardiovascular Disease- V. Fridrich, S. Mizera (72); Middle Slovak Institute of Cardiovascular Disease- P. Mečiar, P. Kurray (64); **Italy (78): Country Leaders: P. Marino, A. Maggioni**; Country Coordinator: A. Lorimer; Ospedale Di Circolo- E. Verna (36); Ospedale Casa Sollievo Soff.- R. Fanelli, M. Villella (16); Campus Biomedico University- G. DiSciascio (11); Ferrarotto Hospital- AR. Galassi, E. Leotta, C. Grasso (7); University of Verona-Policlinico "G.B. Rossi"- P. Marino, F. Beltrame, A. Marini (3); O.C.S. Maria delle Croci- A. Maresta (2); Careggi Hospital- D. Antonucci, G. Parodi (2); Ospedale Maggiore- D. Ardissino, E. Aurier (1); **Australia (73): Country Leader: JM. Rankin**; Royal Perth Hospital and Hollywood Private Hospital- JM. Rankin, AM. Tunesi (28 (2)); Flinders Medical Centre- D. Chew, M. Cooney (9); Liverpool Hospital- C. Juergens, J. French, L. Connolly (6); Royal Melbourne Hospital and Western Hospital- D. Eccleston, S. Ruane, K. Murphy (6); Fremantle Hospital- A. Whelan, R. Hendriks, D. Greenwell (5); The Prince Charles Hospital- D. Walters, A. Limpus (4); Princess Alexandra Hospital- P. Garrahy, R. Lim, C. Hall (4); The Canberra Hospital- A. Farshid, P. Taverner, A. Kam (3); Austin & Repatriation Medical Centre- M. Horrigan, R. Chan, L. Brown, (3); Prince of Wales Hospital- NS. Jepson, A. Russell (2); Royal Adelaide Hospital- R. Yeend, D. Yudkin (1); **Israel (66): Country Leader: J. Leor**, Country Coordinator: S. Truman; Rambam Medical Center- L. Gruberg, M. Kapeliovich, M. Ben Tzvi (29); Ha'Emek Medical Center- Y. Turgeman, K. Suleiman, L. Golan (19); Bnzi-Zion Medical Center- EG. Abinader, S. Harel (7); Barzilai Medical Center- J. Jafari, O. Tubul, D. Mymon (5); Sheba Medical Center- V. Guetta, S. Ringel, M. Shechter (3); Assaf Harofeh Medical Center- E. Kaluski, Z. Gabara (2); Rabin Medical Center-Beilinson and Rabin Medical Center-Golda- D. Hasdai, Y. Kidron (1); **Belgium (62): Country Leaders: JP. Renkin, J. Col**; Cliniques Universitaires UCL St. Luc- JP. Renkin, J. Col, R. Lauwers (34); Cliniques Universitaires UCL de Mont-Godinne- E. Schroeder, P. Massart, K. Jourdan (12); Clinique Saint Pierre- B. Pirenne, JP. Renkin, J. Col (6); University Hospital Ghent- Y. Taeymans, P. Gheeraert (3); Hospitalier de Jolimont-Lobbès- P. Cheron (2); Clinique Generale Saint-Jean- M. Castadot (2); AZ Middelheim- P. Van Den Heuvel, C. Jacobs (2); AZ Sint-Jan- P. Coussement, J. Decante, A. Rotsaert (1); **Austria (59):** Medical University

of Vienna-Department of Internal Medicine II- I. Lang, P. Probst, C. Adlbrecht (38); Wilhelminenhospital, 3rd Medical Dept. Cardiology and Emergency Medicine- K. Huber, T. Höchtl (21); **Portugal (52)**: Hospital Fernando Fonseca- P. Abreu, B. Thomas, M. Nedio (52); **Greece (47): Country Leader: C. Anagnostopoulos**; University Hospital of Ioannina, Dept. of Cardiology- LK. Michalis, CS. Katsouras, D. Nikas (28); Athens Euroclinic- D. Katritsis, S. Korovesis (15); Onassis Cardiac Surgery Center- DV. Cokkinos, V. Voudris (4); **Switzerland (47): Country Leader: ME. Pfisterer**; Country Coordinator: MJ. Zellweger; University Hospital Basel- M. Pfisterer, MJ. Zellweger (28); Cardiocentro- T. Moccetti, P. Elena, M. Rossi (14); University Hospital Inselspital Bern- M. Togni, C. Schoenenberger (5); **France (44): Country Leader: PG. Steg**, Country Coordinator: H. Abergel; CHU Besancon- P. Legalery, F. Schiele (14); Hopital Louis Pasteur- C. Thuair (12); Hôpital Bichat- PG. Steg, H. Abergel (10); C.H.U. Ranguel / Service de Cardiologie B- D. Carrie, J. Cahuzac (3); CHU-Hopital G. et R. Laennec- DP. Crochet, A. Tirouvanziam, B. Hauraix (2); Tenon Hospital- E. Garbarz (1); C.H.R. Metz Thionville-Hopital N.D. De Bon Secours-. K. Khalifé, M. Boursier, L. Schiro, M. Yassine (1); C.H.U. Antoine Beclere / Service de Cardiologie- M. Slama (1); **New Zealand (41): Country Leader: H. White**; Waikato Hospital- G. Devlin, D. Peek, L. Low (27); Greenlane Clinical Centre- H. White, J. French, B. Williams (5); Tauranga Hospital- G. Porter, J. Goodson (5); Wellington Hospital- P. Matsis, B. Scott (3); Dunedin Hospital- IP. Kay, M. McLelland (1); **Argentina (27): Country Leader: CR. Vozzi**; Hemodinamia Rosario- CR. Vozzi, M. Cardonna (24); CEMIC- JJ. Fuselli (2); Instituto Cardiovascular de Buenos Aires- R. Henquin, L. Guzman (1); **Spain (24): Country Leader: JM. Hernandez**; Hospital Virgen de la Salud- J. Moreu Burgos, T. Cantón, L. Rodriguez, M. Villalta (11); Virgen de la Victoria de Málaga- JM. Hernandez, J. Briales, M. Jimenez-Navarro (9); Hospital Universitario Dr. Peset- A. Rincón de Arellano, A. Salvador (4); **Czech Republic (19)**: Division Cardiology, Dept Medicine, University Hospital Motol- P. Hajek (11); IKEM Klinika Kardiologie- J. Kettner, J. Kohoutek, V. Stanek (8); **Chile (16)**: Hospital Clinico Universidad de Chile- FJ. Ayala (5); Hospital Dr. Gustavo Fricke- S. Villablanca, H. Torres, B. Westerberg (5); Hospital San Juan de Dios- A. Bellet, P. Sepúlveda (4); Hospital-Universidad Católica de Chile- A. Fajuri, A. Martinez (2); **Colombia (11)**: Fundación Cardiovascular del Oriente Colombiano- CA. Morillo, F. Saaibi, K. Castillo, R. Agohn (10); Fundación Valle del Lili- C. Arana-Londoño, M. Badiel-Ocampo (1); **Latvia (6)**: Latvian Centre of Cardiology, P. Stradins Clinical University Hospital- A. Erglis, I. Zakke (6); **United Kingdom (6)**: Royal Victoria Hospital- J. Adgey, PW. Johnston (4); St. Thomas' Hospital- SR. Redwood, D. Perera, S. Hogan (1); **Romania (5)**: Timisoara Institute of Cardiovascular Medicine- SI. Dragulescu, B. Mut-Vitcu, D. Maximov (5); **Dominican Republic (4)**: CEDIMAT- PE. Ureña, MJ. Rodríguez, EM. Minaya (4); **Costa Rica (2)**: Hospital Mexico- W. Lopez (2); **Russia (2)**: Tyumen Cardiology Center- S. Shalaev, I. Zarianov (2); **Germany (1)**: Krankenhaus Munchen Neuperlach- H. Mudra, M. Segerer, M. Hug (1)

**OAT Committees and Coordinating Centers. Executive Committee:** JS. Hochman (Chair), GA. Lamas (Co-Chair), CE. Buller, V. Dzavik, G. Knatterud, AP. Maggioni, D. Mark, A. Mascette, H. White; **Steering Committee** : JS. Hochman (Chair), GA. Lamas (Co-Chair), CE. Buller, AC. Carvalho, J. Col, V. Dzavik, G. Knatterud, J. Leor, AP. Maggioni, D. Mark, A. Mascette, ME. Pfisterer, J. Rankin, J. Renkin, W. Ruzyllo, Z. Sadowski, G. Steg, C. Vozzi, H. White; **Operations Committee:** S. Abramsky, D. Atchison, CE. Buller, N. Clapp-Channing, V. Dzavik, S. Forman, JS. Hochman, G. Knatterud, GA. Lamas, D. Mark, A. Mascette, A. Mon, E. Yeoh; **Data Safety and Monitoring Board:** D. Williams (Chair), E. Antman, E. Brittain, F.

Cohn, T. Gardner (1999-2004, W. Baumgartner (2004-2006); **Mortality and Morbidity Classification Committee:** ER. Passamani (Chair), DD. Ascheim, MG. Bourassa, CP. Cannon, R.Cannon, R. Goldstein, E. Lichstein, G. McKendall, MA. Sloan, K. Teo; **Publications Committee:** GA. Lamas (Chair), CE. Buller, AC. Carvalho, EA. Cohen, V. Dzavik, JS. Hochman, G. Knatterud, D. Mark, V. Menon, M. Ragosta, J. Rankin, J. Renkin, HR. Reynolds, W. Ruzyllo, Z. Sadowski, C. Vozzi, H. White; **Ancillary Studies Committee:** GA. Lamas (Chair), EA. Cohen, J. French, M. Ohman, M. Ragosta, G. Knatterud, J. Vanoverschelde; **NHLBI Program Staff:** P. Desvigne-Nickens, A. Mascette, G. Sopko; **Clinical Coordinating Center:** JS. Hochman (Chair), S. Abramsky, V. Menon (1999-2002), K. Ramanathan (2003-2005), HR. Reynolds, A. Roberts, C. Russo; **Office of the Study Co-Chair:** GA. Lamas (Co-Chair), A. Mon; **Data Coordinating Center:** G. Knatterud (Principal Investigator), B. Barton, S. Fick, S. Forman, C. Fuller, R. Gross, C. Handy, S. Pollizzi, W. Riggie, B. Thompson; **Economics and Quality of Life Coordinating Center:** D. Mark (Principal Investigator), N. Clapp-Channing, L. Davidson-Ray, W. Pan, T. Redick, J. Blevins, H. Read, B. Sanderford; **Angiography Core Laboratory:** GBJ. Mancini (Director), CE. Buller (Co-Director), E. Yeoh, **OAT-EP Coordinating Center-**University of Maryland: E. Rashba (Principal Investigator, Grant R01 HL72906), S. Hollist; **OAT-NUC Coordinating Center:** Tufts-New England Medical Center: J. Udelson (Principal Investigator, Grant R01 HL075456), C. Kimmelstiel, D. Kinan, C. Pearte (NYU); **TOSCA-2 Coordinating Center:** Toronto General Hospital: V. Dzavik (Principal Investigator, Grant HL67683 ), D. Atchison.
